# Supplementary material
Source: MDPI journal article supplement (https://www.mdpi.com/2071-1050/14/16/10317)
Supplement: s1 [file s1]

*Supplementary Materials*

# Coupled Hydrogeochemical Approach and Sustainable Technologies for the Remediation of a Chlorinated Solvent Plume in an Urban Area

Paolo Ciampi <sup>1,2,\*</sup>, Carlo Esposito <sup>1,2</sup>, Ernst Bartsch <sup>3</sup>, Eduard J. Alesi <sup>3</sup>, Christian Nielsen <sup>4</sup>, Laura Ledda <sup>4</sup>, Laura Lorini <sup>5</sup> and Marco Petrangeli Papini <sup>2,5</sup>

<sup>1</sup> Department of Earth Sciences, Sapienza University of Rome, Piazzale Aldo Moro 5, 00185 Rome, Italy

<sup>2</sup> CERI Research Center, Sapienza University of Rome, Piazzale Aldo Moro 5, 00185 Rome, Italy

<sup>3</sup> IEG Technologie GmbH, Hohlbachweg 2, D-73344 Gruibingen, Baden-Württemberg, Germany

<sup>4</sup> TAUW Italia, Piazza Leonardo da Vinci 7, 20133 Milano, Italy

<sup>5</sup> Department of Chemistry, Sapienza University of Rome, Piazzale Aldo Moro 5, 00185 Rome, Italy

\* Correspondence: paolo.ciampi@uniroma1.it

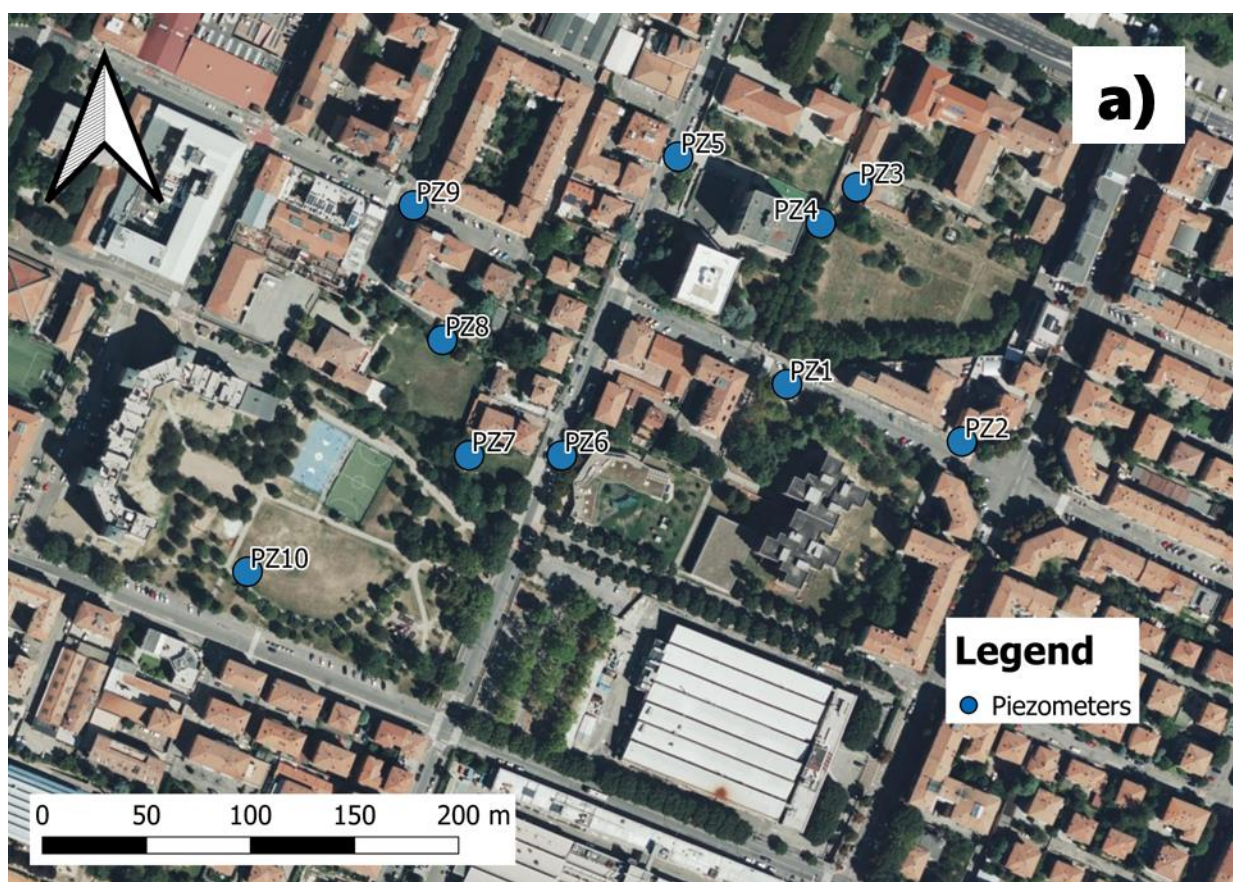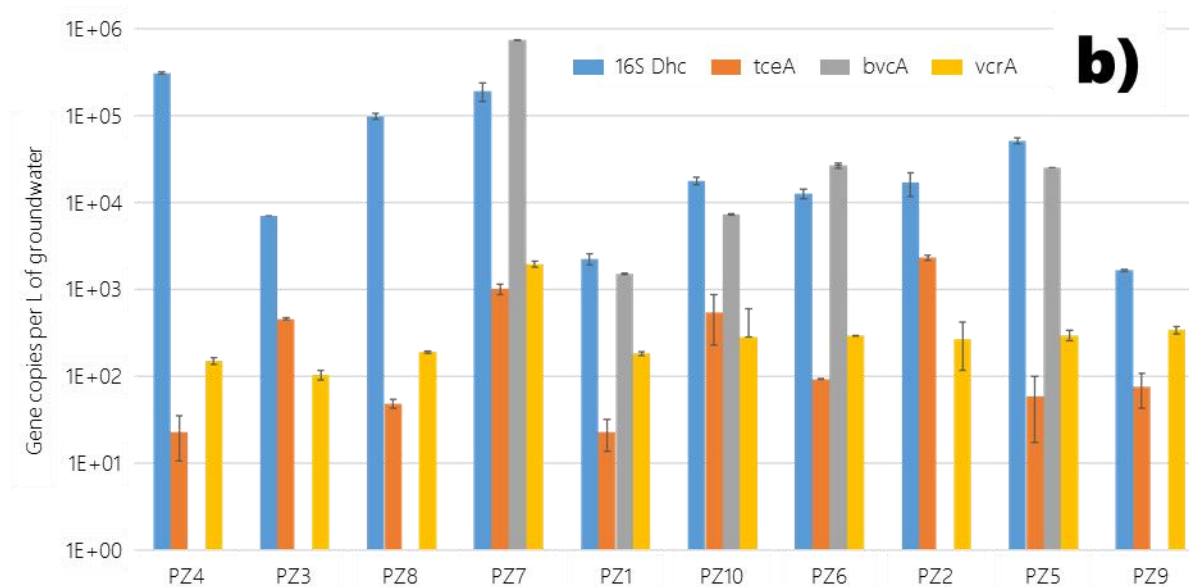

**Figure S1.** Location of the 10 piezometers that were sampled for microbiological analysis (a). Results of microbiological characterization in terms of gene copies per liter of groundwater. The graph shows both the total concentrations of Dehalococcoides and the individual functional genes responsible for individual steps in the reductive dechlorination of PCE (b).

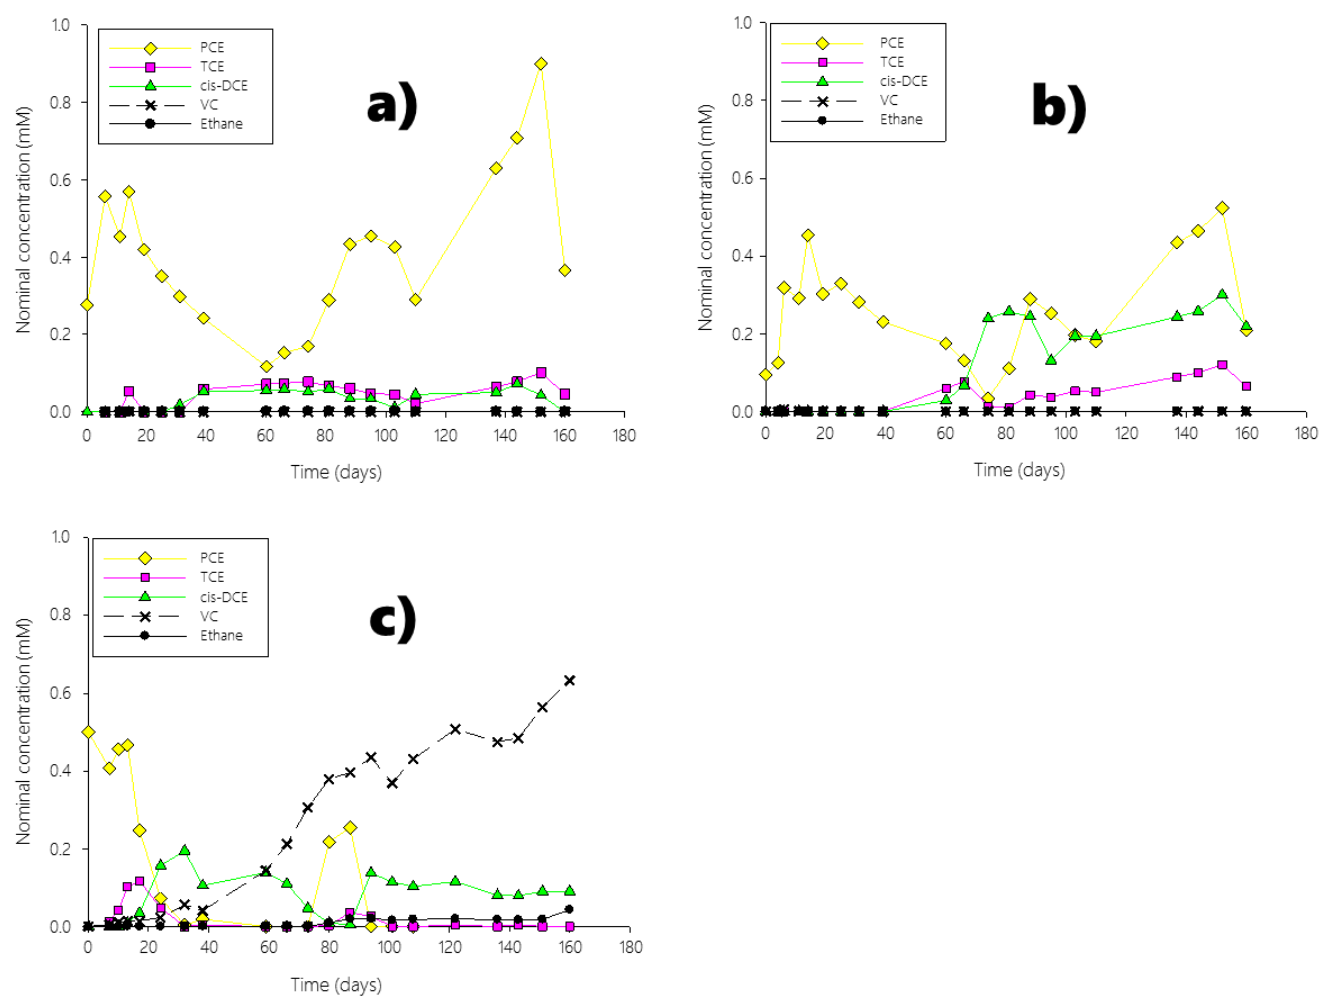

**Figure S2.** Detected concentrations of PCE, TCE, cis-DCE, VC, and ethene during microcosm tests without the addition of electron donor (a), with supplementation of electron donor only (b), by adding both electron donor and inoculum (c).



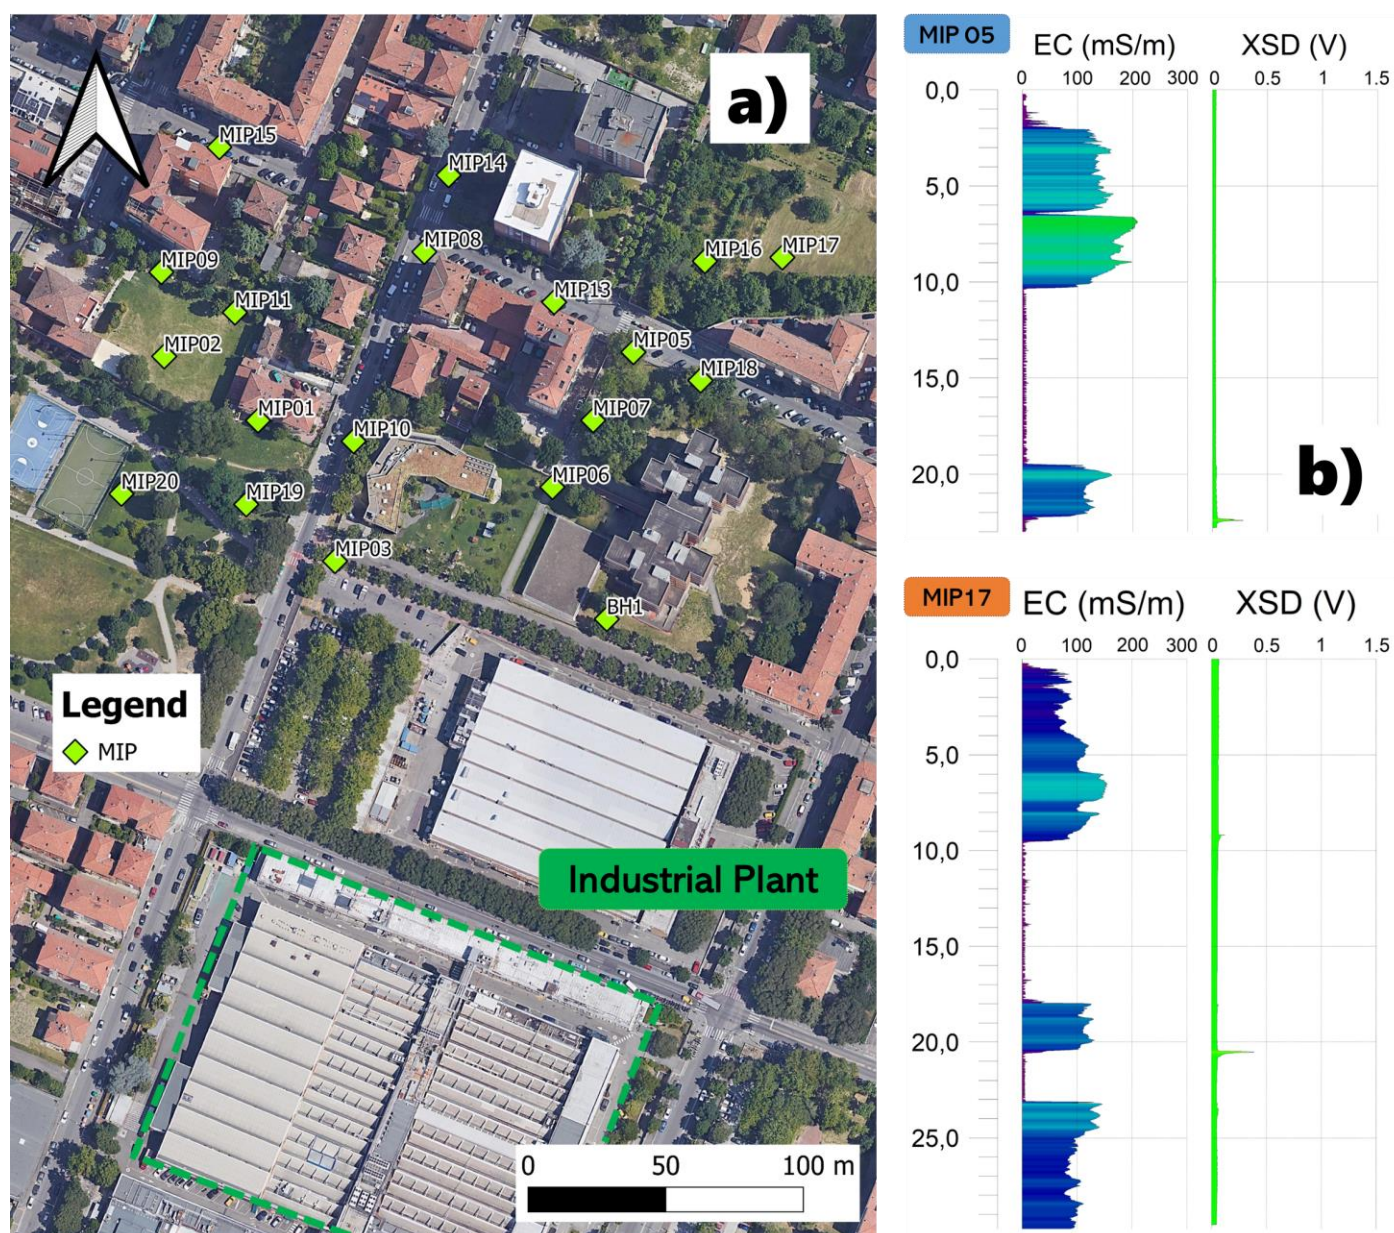

**Figure S3.** Location of MIP investigation north of the industrial plant (a). Electrical conductivity (EC) and halogen-specific detector (XSD) vertical profiles acquired via MIP at the MIP05 and MIP17 points (b).

| Borehole / Well /<br>Piezometer | Groundwater Level<br>(m a.s.l.) |
|---------------------------------|---------------------------------|
| CGC01                           | 22,22                           |
| CGC02                           | 22,29                           |
| CGC03                           | 22,36                           |
| CGC04                           | 22,48                           |
| CGC05                           | 22,8                            |
| CGC06                           | 22,88                           |
| CGC07                           | 22,95                           |
| CGC08                           | 22,88                           |
| CGC09                           | 22,87                           |
| CGC10                           | 22,8                            |
| CGC11                           | 22,44                           |
| CGC12                           | 22,36                           |
| CGC13                           | 23,26                           |
| CGC14                           | 22,72                           |
| CGC15                           | 22,45                           |
| CGC16                           | 22,35                           |
| CGC17                           | 22,29                           |
| CGC18                           | 22,24                           |
| CGC19                           | 22,19                           |
| CGC20                           | 22,13                           |
| CGC21                           | 22,08                           |
| CP4                             | 22,4                            |
| CP7                             | 25,83                           |
| CP8                             | 26,98                           |
| CP3                             | 22,36                           |
| CP1                             | 22,66                           |
| PZ1                             | 23,82                           |

**Table S1.** Observed groundwater levels at the measurement points of the monitoring network.

| Days | Mass of PCE<br>extracted (kg) in<br>the period | Cumulative mass<br>of PCE extracted<br>(Kg) |
|------|------------------------------------------------|---------------------------------------------|
| 4    | 0,0                                            | 0,0                                         |
| 5    | 0,2                                            | 0,2                                         |
| 21   | 0,8                                            | 1,0                                         |
| 34   | 1,3                                            | 2,2                                         |
| 48   | 0,7                                            | 3,0                                         |
| 62   | 3,4                                            | 6,4                                         |
| 92   | 1,0                                            | 7,3                                         |
| 125  | 1,2                                            | 8,5                                         |
| 156  | 2,3                                            | 10,8                                        |
| 184  | 5,4                                            | 16,2                                        |
| 271  | 0,1                                            | 16,3                                        |
| 285  | 0,2                                            | 16,5                                        |
| 302  | 5,2                                            | 21,7                                        |
| 315  | 1,3                                            | 23,0                                        |
| 329  | 1,7                                            | 24,7                                        |
| 357  | 7,3                                            | 32,0                                        |
| 385  | 2,9                                            | 34,9                                        |
| 412  | 5,6                                            | 40,5                                        |
| 446  | 4,0                                            | 44,5                                        |

**Table S2.** Extracted PCE mass (in kg) over time (days) since the startup of the IEG CGC-AS®-annexed plant along with the A-B barrier.

| Days | PCE<br>Concentration<br>(µg/L) in CP1 | PCE<br>Concentration<br>(µg/L) in CP3 |
|------|---------------------------------------|---------------------------------------|
| 0    | 2550,0                                | 159,0                                 |
| 20   | 1560,0                                | 510,0                                 |
| 35   | 1670,0                                | 159,0                                 |
| 49   | 1170,0                                | 430,0                                 |
| 62   | 870,0                                 | 189,0                                 |
| 92   | 810,0                                 | 400,0                                 |
| 124  | 840,0                                 | 570,0                                 |
| 156  | 500,0                                 | 430,0                                 |
| 184  | 400,0                                 | 220,0                                 |
| 217  | 40,0                                  | 1890,0                                |
| 252  | 75,0                                  | 810,0                                 |
| 264  | 7,8                                   | 730,0                                 |
| 284  | 213,0                                 | 820,0                                 |
| 301  | 139,0                                 | 450,0                                 |
| 314  | 264,0                                 | 800,0                                 |
| 328  | 52,0                                  | 400,0                                 |
| 356  | 5,9                                   | 144,0                                 |
| 384  | 15,1                                  | 74,0                                  |
| 411  | 89,0                                  | 80,0                                  |
| 445  | 288,0                                 | 118,0                                 |

**Table S3.** Detected PCE concentrations (µg/L) over time (days) at the CP1 and CP3.

| Days | Mass of PCE<br>extracted (kg) in<br>the period | Cumulative mass<br>of PCE extracted<br>(Kg) |
|------|------------------------------------------------|---------------------------------------------|
| 5    | 0,0                                            | 0,2                                         |
| 19   | 1,0                                            | 1,2                                         |
| 33   | 0,2                                            | 1,4                                         |
| 48   | 2,4                                            | 3,8                                         |
| 63   | 0,2                                            | 4,0                                         |
| 91   | 17,1                                           | 21,1                                        |
| 119  | 4,9                                            | 26,0                                        |
| 147  | 1,7                                            | 27,7                                        |
| 182  | 1,8                                            | 29,5                                        |

**Table S4.** Extracted PCE mass (in kg) over time (days) since the start-up of the IEG CGC-AS®-annexed plant along with the C-D barrier.

| Days | PCE<br>Concentration<br>(µg/L) |
|------|--------------------------------|
| 0    | 1080,0                         |
| 27   | 4100,0                         |
| 34   | 7900,0                         |
| 47   | 6700,0                         |
| 62   | 7800,0                         |
| 83   | 8700,0                         |
| 90   | 4400,0                         |
| 96   | 3600,0                         |
| 103  | 6400,0                         |
| 110  | 8300,0                         |
| 118  | 3600,0                         |
| 144  | 3700,0                         |
| 181  | 1750,0                         |

**Table S5.** Measured PCE concentrations (µg/L) over time (days) at the CP4.

| Days | PCE<br>Concentration<br>(µg/L) in CP7 | PCE<br>Concentration<br>(µg/L) in CP8 |
|------|---------------------------------------|---------------------------------------|
| 0    | 700,0                                 | 1020,0                                |
| 63   | 1,7                                   | 102,0                                 |
| 94   | 1,2                                   | 0,2                                   |
| 122  | 4,2                                   | 2,2                                   |
| 149  | 4,1                                   | 70,0                                  |
| 177  | 1,1                                   | 57,0                                  |

**Table S6.** Measured PCE concentrations at the injection intervention control points, CP7 and CP8.



| Days | PCE<br>Concentration<br>(µg/L) | TCE<br>Concentration<br>(µg/L) | 1,2-DCE<br>Concentration<br>(µg/L) | VC Concentration<br>(µg/L) |
|------|--------------------------------|--------------------------------|------------------------------------|----------------------------|
| 0    | 1330,0                         | 2,1                            | 2,9                                | 0,0                        |
| 16   | 2850,0                         | 4,6                            | 0,5                                | 0,0                        |
| 63   | 1030,0                         | 60,0                           | 13,1                               | 0,0                        |
| 77   | 0,1                            | 0,0                            | 1300,0                             | 0,3                        |
| 94   | 24,9                           | 3,6                            | 1300,0                             | 0,2                        |
| 122  | 40,0                           | 4,4                            | 1500,0                             | 0,4                        |
| 133  | 560,0                          | 29,0                           | 1600,0                             | 0,5                        |
| 149  | 430,0                          | 25,2                           | 880,0                              | 0,2                        |
| 177  | 460,0                          | 30,0                           | 1300,0                             | 0,4                        |

**Table S7.** concentrations of the parameters PCE, TCE, 1,2-DCE, and VC in the PZ1 monitoring piezometer.
